# Supplementary material for: Genomic Characterization by Whole-Exome Sequencing of Hypermobility Spectrum Disorder
Source: MDPI journal article supplement (doi:10.3390/genes13071269), 2022-07-18
Supplement: s1 [file s1]

**Supplementary Table S1.** Clinical Data of patients involved in the study

| Phenotype                                     | S1  | S2  | S3  | S4  | S5  |
|-----------------------------------------------|-----|-----|-----|-----|-----|
| Sex                                           | F   | F   | M   | F   | M   |
| Age                                           | 13  | 49  | 25  | 19  | 70  |
| Family history                                | +   | +   | +   | -   | +   |
| The Five-Point Questionnaire 5PQ [1]          | +   | +   | +   | +   | +   |
| Beighton Score                                | 6/9 | 6/9 | 7/9 | 7/9 | 6/9 |
| Mucocutaneous                                 |     |     |     |     |     |
| Unusually soft or velvety skin                | +   | +   | +   | +   | +   |
| Mild skin hyperextensibility                  | +   | -   | +   | +   | -   |
| Unexplained striae                            | -   | -   | -   | -   | -   |
| Bilateral piezogenic papules of the heel      | -   | -   | +   | +   | -   |
| Recurrent or multiple abdominal hernia(s)     | -   | +   | -   | -   | -   |
| Atrophic scarring                             | -   | -   | +   | -   | -   |
| Pelvic floor, rectal, and/or uterine prolapse | -   | -   | -   | -   | -   |
| Marfanoid features                            |     |     |     |     |     |
| Dental crowding and high or narrow palate     | -   | -   | -   | -   | +   |
| Mitral valve prolapse                         | -   | -   | -   | -   | -   |
| Arm span-to-height ratio $\geq 1.05$          | +   | +   | -   | -   | -   |
| Arachnodactyly                                | -   | +   | -   | +   | -   |
| Aortic root dilatation with Z-score $>+2$     | -   | -   | -   | -   | -   |
| Musculoskeletal                               |     |     |     |     |     |
| Musculoskeletal pain                          | +   | +   | -   | +   | +   |
| Chronic widespread pain                       | -   | -   | -   | -   | -   |
| Recurrent joint dislocations                  | -   | -   | +   | +   | -   |
| frank joint instability                       | -   | +   | +   | +   | +   |
| Mild scoliosis                                | -   | -   | -   |     | +   |
| Flat foot                                     | +   | -   | +   | -   | +   |
| Genu o cubitus valgus                         | +   | +   | +   | +   | +   |
| Gastrointestinal                              |     |     |     |     |     |
| Gastroesophageal reflux                       | -   | -   | -   | +   | +   |
| Defecatory dysfunction                        | -   | -   | +   | +   | -   |
| Neuropsychiatric                              |     |     |     |     |     |
| Impaired memory and concentration             | -   | -   | -   | +   | -   |
| Cardiovascular dysautonomia                   | +   | -   | +   | +   | +   |
| Anxiety                                       | -   | -   | -   | +   | -   |
| Proprioception dysfunction                    | -   | -   | +   | +   | +   |
| Allergies                                     |     |     |     |     |     |
| Rhinitis                                      | -   | -   | +   | -   | +   |
| Atopic dermatitis                             | -   | -   | +   | +   | -   |
| Ocular                                        |     |     |     |     |     |
| Myopia                                        | -   | -   | -   | +   | +   |
