# Supplementary figures and images for: Genomic Characterization by Whole-Exome Sequencing of Hypermobility Spectrum Disorder
Source: MDPI journal article supplement (doi:10.3390/genes13071269), 2022-07-18

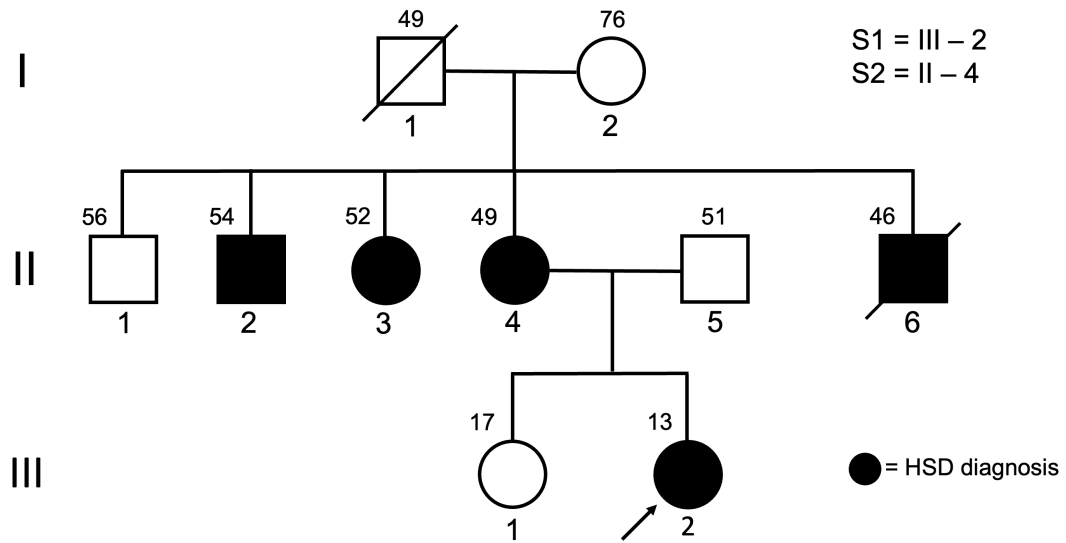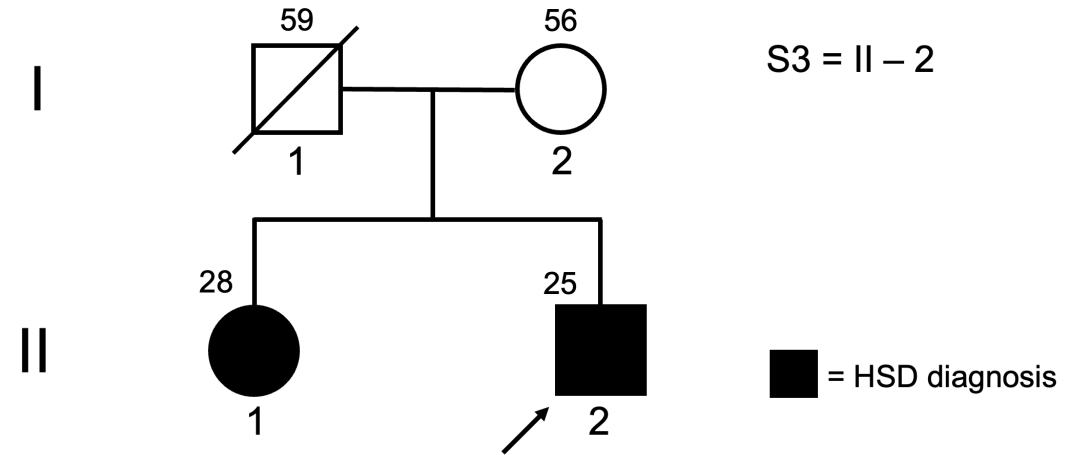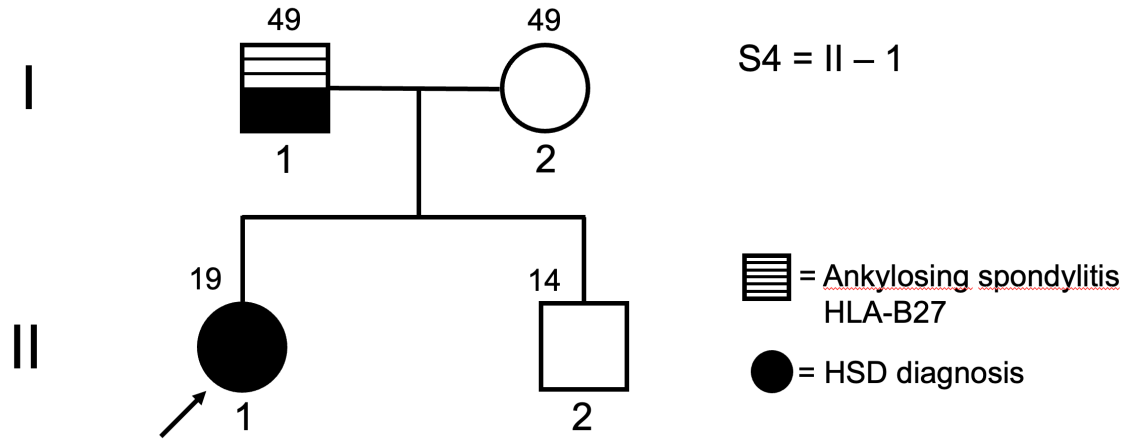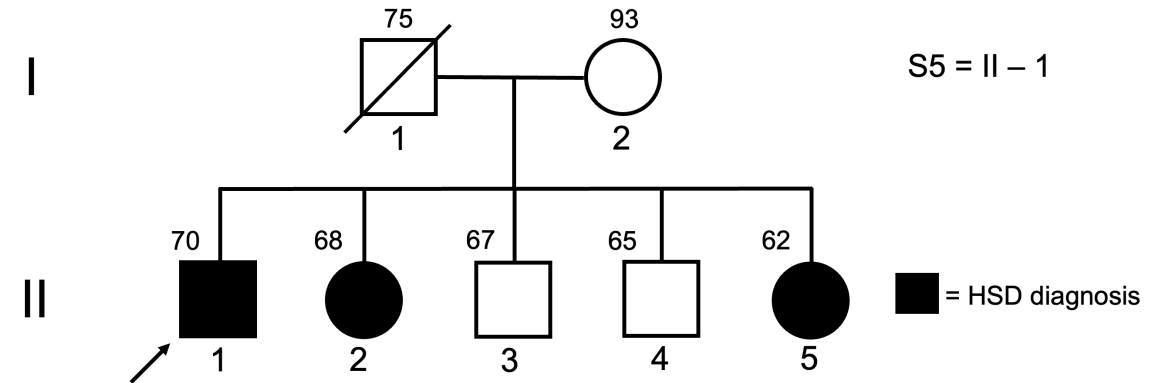

Supplement: s1 [file s1]
